# Supplementary material for: Inhibition of Fungal Growth and Aflatoxin B1 Synthesis in Aspergillus flavus by Plasma-Activated Water
Source: MDPI journal article supplement (doi:10.3390/foods12132490), 2023-06-26
Supplement: s1 [file s1]

# Supporting Information

## Inhibition of fungal growth and aflatoxin B1 synthesis in *Aspergillus flavus* by plasma-activated water

Yao Qihuan<sup>1,2,3,#</sup>, Xu Hangbo<sup>1,2,3,#</sup>, Zhuang Jie<sup>4</sup>, Cui Dongjie<sup>1,2,3,\*</sup>, Ma Ruonan<sup>1,2,3,\*</sup> and Jiao  
Zhen<sup>1,2,3</sup>

1 Zhengzhou Research Base, State Key Laboratory of Cotton Biology, School of Agricultural Sciences, Zhengzhou University, Zhengzhou 450001, China

2 Henan Key Laboratory of Ion-Beam Bioengineering, School of Agricultural Sciences, Zhengzhou University, Zhengzhou 450052, China

3 Sanya Institute, Zhengzhou University, Zhengzhou 450001, China

4 Suzhou Institute of Biomedical Engineering and Technology, Chinese Academy of Sciences, Suzhou 215163, China

\* Corresponding authors.

E-mail addresses: [cuidongjie0323@zzu.edu.cn](mailto:cuidongjie0323@zzu.edu.cn) (D. Cui) and [maruonan@zzu.edu.cn](mailto:maruonan@zzu.edu.cn) (R. Ma).

# These authors contributed equally to this work.

Table S1. The list of primers and the corresponding clustered aflatoxin biosynthesis pathway genes showing enzymes involved and their functions in the study.

| Target Gene      | Sequences (5'—3')                                               | Function in the Biosynthetic Pathway                    | Target Size (bp) |
|------------------|-----------------------------------------------------------------|---------------------------------------------------------|------------------|
| <i>β-Tubulin</i> | Forward: CTTGTTGACCAGGTTGTGGAT<br>Reverse: GTCGCAGCCCTCAGCCT    | Reference housekeeping gene                             | 51               |
| <i>aflD</i>      | Forward: GTCCAAGCAACAGGCCAAGT<br>Reverse: TCGTGCATGTTGGTGATGGT  | Norsolorinic acid (NOR) → averantin (AVN)               | 66               |
| <i>aflP</i>      | Forward: GGCCGCCGCTTTGATCTAGG<br>Reverse: ACCACGACCGCCGCC       | Sterigmatocystin (ST) → O-methylsterigmatocystin (OMST) | 123              |
| <i>aflQ</i>      | Forward: GTGTCCGCAGTGTCTAGCTT<br>Reverse: GCTCAAAGGTCGCCAGAGTA  | O-methylsterigmatocystin (OMST) → aflatoxin B1 (AFB1)   | 115              |
| <i>aflR</i>      | Forward: CTCAAGGTGCTGGCATGGTA<br>Reverse: CAGCTGCCACTGTTGGTTTC  | Pathway regulator                                       | 86               |
| <i>aflS</i>      | Forward: CTGCAGCTATATTGCCACACA<br>Reverse: TAAACCCAGGCAGAGTTGGT | Pathway regulator                                       | 117              |

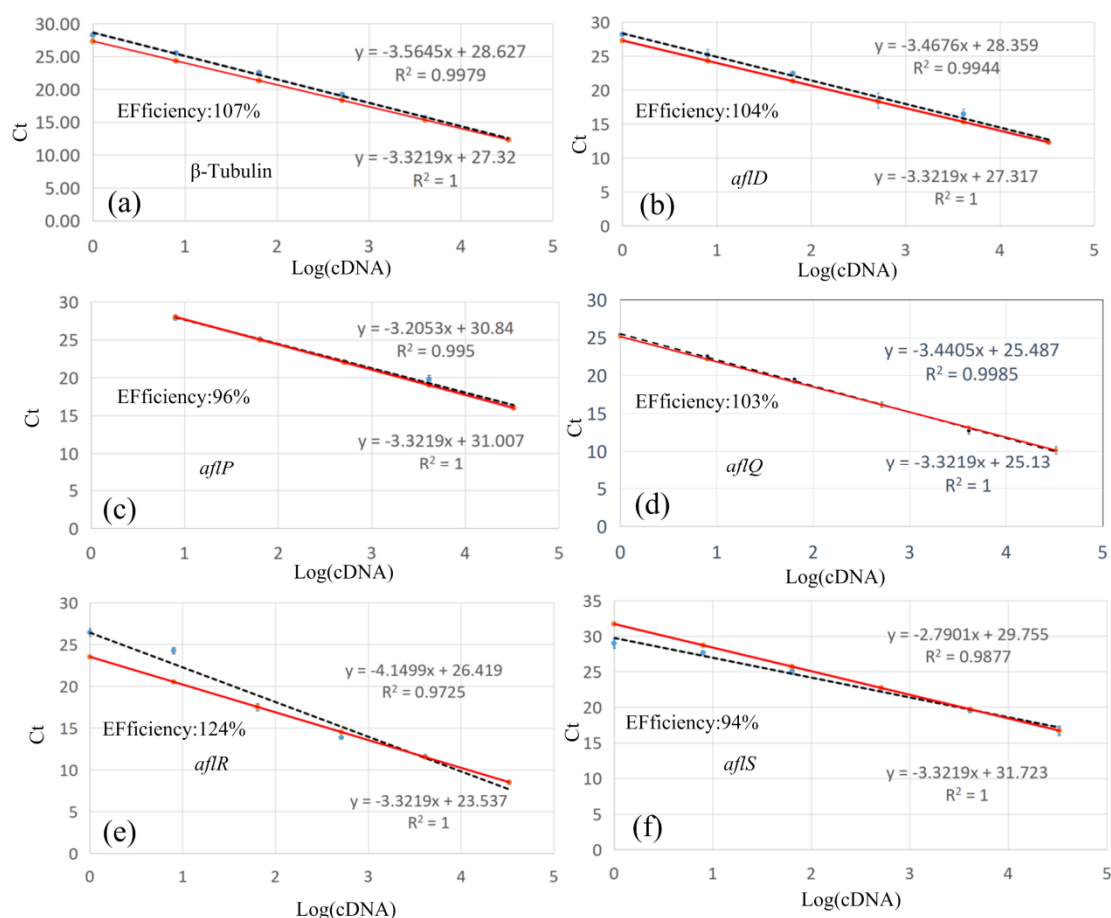

Figure S1: Representative standard curves and efficiency of each pair of primers. (a)  *$\beta$ -Tubulin*, (b) *aflD*, (c) *aflP*, (d) *aflQ*, (e) *aflR*, and (f) *aflS*. (Solid red lines denote the theoretical calculation curves. Dashed black lines indicate measurement curves)
